# Supplementary material
Source: MDPI journal article supplement (https://www.mdpi.com/2073-445X/12/7/1373)
Supplement: s1 [file s1]

**Table S1.** POI Data Sources

| <b>Data sources category</b>                            | <b>Website</b>                                                                                                                                                                                                                                                                                                                                                                                                                                        |
|---------------------------------------------------------|-------------------------------------------------------------------------------------------------------------------------------------------------------------------------------------------------------------------------------------------------------------------------------------------------------------------------------------------------------------------------------------------------------------------------------------------------------|
| Social media platform                                   | Social media platform website<br>( <a href="https://www.dianping.com/">https://www.dianping.com/</a><br><a href="https://www.xiaohongshu.com/explore">https://www.xiaohongshu.com/explore</a> )                                                                                                                                                                                                                                                       |
| The city open data platform                             | Suzhou Public Data Open Platform<br>( <a href="https://data.suzhou.gov.cn/#/home">https://data.suzhou.gov.cn/#/home</a> )<br>Shanghai Public Data Open Platform<br>( <a href="https://data.sh.gov.cn/index.html">https://data.sh.gov.cn/index.html</a> )<br>Jiaxing Municipal People's Government<br>( <a href="https://www.jiaxing.gov.cn/col/col1536218/index.html">https://www.jiaxing.gov.cn/col/col1536218/index.html</a> )                      |
| Official government website                             | Wujiang District People's Government<br>( <a href="http://www.wujiang.gov.cn/">http://www.wujiang.gov.cn/</a> )<br>Qingou District People's Government<br>( <a href="https://www.shqp.gov.cn/shqp/index.html">https://www.shqp.gov.cn/shqp/index.html</a> )<br>Jiashan County People's Government<br>( <a href="https://www.jiaxing.gov.cn/col/col1536218/index.html">https://www.jiaxing.gov.cn/col/col1536218/index.html</a> )                      |
| The information website of intangible cultural heritage | Suzhou Intangible Cultural Heritage Information Network<br>( <a href="https://szfy.wglj.suzhou.com.cn/map">https://szfy.wglj.suzhou.com.cn/map</a> )<br>Shanghai Intangible Cultural Heritage Network<br>( <a href="http://www.ichshanghai.cn/">http://www.ichshanghai.cn/</a> )<br>Jiashan County People's Government<br>( <a href="https://www.jiaxing.gov.cn/col/col1536218/index.html">https://www.jiaxing.gov.cn/col/col1536218/index.html</a> ) |
| POI dataset location                                    | Application Programming Interface (API) of Gaode Map<br>( <a href="https://lbs.amap.com/cooperation/about/us/">https://lbs.amap.com/cooperation/about/us/</a> )                                                                                                                                                                                                                                                                                       |

**Table S2.** Environmental Variable Data Sources

| Type                          | Variable                         | Data source                                                                                                                                                                                                         |
|-------------------------------|----------------------------------|---------------------------------------------------------------------------------------------------------------------------------------------------------------------------------------------------------------------|
| Natural environment factors   | Elevation                        | Geospatial Data Cloud<br>( <a href="http://www.gscloud.cn/">http://www.gscloud.cn/</a> )                                                                                                                            |
|                               | Slope                            | Calculated based on the elevation data in Arcgis                                                                                                                                                                    |
|                               | Aspect                           | Calculated based on the elevation data in Arcgis                                                                                                                                                                    |
|                               | Annual average temperature       | National Qinghai-Tibet Plateau Data Center<br>( <a href="https://data.tpdc.ac.cn/zh-hans/data/71ab4677-b66c-4fd1-a004-b2a541c4d5bf">https://data.tpdc.ac.cn/zh-hans/data/71ab4677-b66c-4fd1-a004-b2a541c4d5bf</a> ) |
|                               | Distance to water                | Calculated the Euclidean distance in Arcgis                                                                                                                                                                         |
| Geographical distance factors | Distance to railways             | Open Street Map<br>( <a href="https://www.openstreetmap.org/#map=11/22.3567/114.1363">https://www.openstreetmap.org/#map=11/22.3567/114.1363</a> )                                                                  |
|                               | Distance to highways             |                                                                                                                                                                                                                     |
|                               | Distance to national roadways    |                                                                                                                                                                                                                     |
|                               | Distance to provincial highways  | National Bureau of Statistics' official website<br>( <a href="http://www.stats.gov.cn/sj/tjbz/tjyqhdmhcxhfdm/2020/index.html">http://www.stats.gov.cn/sj/tjbz/tjyqhdmhcxhfdm/2020/index.html</a> )                  |
|                               | Distance to A-level scenic spots |                                                                                                                                                                                                                     |
|                               | Distance to township centers     |                                                                                                                                                                                                                     |
| Human activity factors        | Land use and land cover          | PIE-Engine<br>( <a href="https://engine.piesat.cn/dataset-list">https://engine.piesat.cn/dataset-list</a> )                                                                                                         |
